# Supplementary material for: Microporous Volumes from Nitrogen Adsorption at 77 K: When to Use a Different Standard Isotherm?
Source: MDPI journal article supplement (doi:10.3390/catal11121544), 2021-12-18
Supplement: s1 [file s1]

# Microporous volumes from nitrogen adsorption at 77 K: when to use a different standard isotherm?

João Pires<sup>1,\*</sup>, Rafaela Fernandes<sup>1</sup>, Moisés L. Pinto<sup>2</sup>, Mary Batista<sup>1</sup>

<sup>1</sup> *Centro de Química Estrutural, Faculdade de Ciências da Universidade de Lisboa,  
1749-016, Lisboa, Portugal*

<sup>2</sup> *CERENA, Departamento de Engenharia Química, Instituto Superior Técnico,  
Universidade de Lisboa, 1049-001, Lisboa, Portugal*

## Supporting Information

## **S1 Method for the preparation of the char and the activated carbons**

A mixture of industrial crude glycerin (82% glycerol, from a Portuguese company) and sulfuric acid (95-97%, Sigma-Aldrich) was prepared using a volume ratio (1:0.5). The flask was stirred at room temperature until foaming ceased, typically for ~30 minutes adapting the procedure described elsewhere [1]. Then, the mixture was transferred to an autoclave (Teflon-lined, stainless-steel) and the acid carbonization was made at 180 °C for 6 h in an oven (Medline Sci. Ltd., mod. ON-02G). The acid glycerin-*char* was washed (distilled water until pH 7) and dried at 100 °C. The obtained solid was crushed to a fine powder (dimensions < 0.297 mm). The glycerin-*char* (1 g) was mixed with the adequate KOH amount dissolved ~ 10 cm<sup>3</sup> of distilled water, followed by stirring for 2 h at ambient temperature, and then dried at 100 °C until complete water evaporation. The samples were activated at 700 °C and KOH:char weight ratios were 1:1 (for the material C2) and 2:1 for the material C1. The mixture was activated in a horizontal furnace (Thermolyne, model 21100) under N<sub>2</sub> flow (5 cm<sup>3</sup> s<sup>-1</sup>). The temperature was raised (10 °C min<sup>-1</sup>) up to the activation temperature and kept for 1 h. After the chemical activation process, post-chemical activation was required to remove excess activating agent from the activated carbons. The glycerin-*activated carbons* were treated with HCl solution (1M), then washed with distilled water until pH 7, and dried at 100 °C to allow the evaporation of the excess water. The sample C3 was a commercial sample from Norit.

## S2. Mathematical expressions for the various standard isotherms

For the universal *t*-curve the expression from Lippens and de Boer [2] was used:

$$t/\text{\AA} = \left[ \frac{13.99}{0.034 - \log(p/p^0)} \right]^{0.5}$$

For the hydroxylated silica [3], the carbon [4] and the char, all used in the form of  $\alpha_s$ -

plots, a polynomial equation of the type  $\alpha_s = A_0 + A_1 (p/p^0) + A_2 (p/p^0)^2 + A_3$

$(p/p^0)^3$ ...was employed and the coefficients A0 to A9 are given in Table S1.

Table S1 Coefficients of the polynomial equations that relate  $\alpha_s$  and the relative pressure  $(p/p^0)$  for the standard isotherms on the hydroxylated silica, the carbon and the char

|    | carbon     | hydroxylated silica | char    |
|----|------------|---------------------|---------|
| A0 | 0.4964302  | 0.27692439          | 0.9646  |
| A1 | 4.2880233  | 13.403724           | -7.4791 |
| A2 | -47.262408 | -204.06097          | 74.791  |
| A3 | 338.6696   | 1728.6363           | -291.64 |
| A4 | -1432.0171 | -8338.4277          | 552.03  |
| A5 | 3854.6654  | 24215.106           | -504.31 |
| A6 | -6681.7747 | -43107.078          | 178.56  |
| A7 | 7192.6002  | 46012.132           |         |
| A8 | -4345.2612 | -27015.265          |         |
| A9 | 1119.5957  | 6705.4599           |         |

### S3. Pore size distributions

The pore size distributions were obtained from the nitrogen adsorption isotherms at 77 K by NLDFT (non local density functional theory) model provided by NovaWin version 10.0 software.

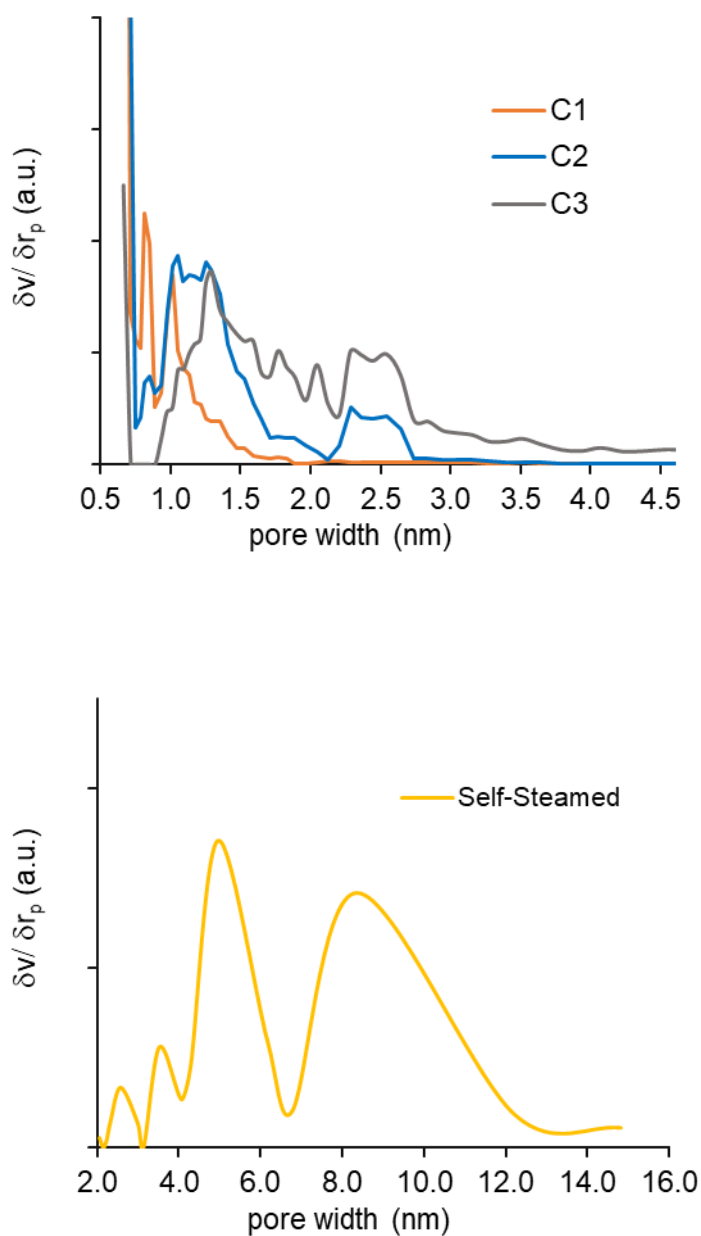

Figure S1. Pore size distributions for the carbon materials (C1, C2 and C3) and for the dealuminated Y zeolite (Self Steamed).

**S4. Structures of the metallic complexes supported in different materials.**

| Complex | Structure                                                                            | Reference |
|---------|--------------------------------------------------------------------------------------|-----------|
| Comp1   | 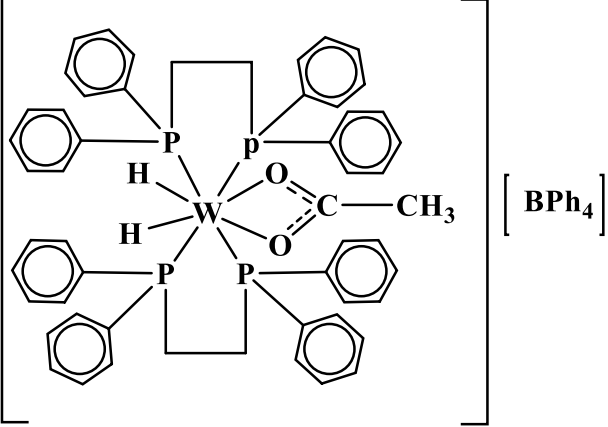   | [5]       |
| Comp2   |   | [6]       |
| Comp3   |  | [7]       |
| Comp4   |  | [8]       |

### S5. Network-accessible geometric volume.

Table S2. Network-accessible geometric volume (in cm<sup>3</sup>g<sup>-1</sup>) obtained with PoreBlazer [9] for the zeolites and MOFs studied in this work.

|          |            |       |
|----------|------------|-------|
| Zeolites | NaY        | 0.362 |
|          | Mordenite  | 0.241 |
|          | ETS-10     | 0.166 |
| MOFs     | CuBTC      | 0.794 |
|          | UiO-66     | 0.426 |
|          | MIL-53(Al) | 0.527 |
|          | MIL-101    | 1.815 |

## References

- [1] B.L.A. Prabhavathi Devi, T. Vijai Kumar Reddy, K. Vijaya Lakshmi, R.B.N. Prasad, A green recyclable SO<sub>3</sub>H-carbon catalyst derived from glycerol for the production of biodiesel from FFA-containing karanja (*Pongamia glabra*) oil in a single step, *Bioresour. Technol.* 153 (2014) 370–373.  
<https://doi.org/10.1016/j.biortech.2013.12.002>.
- [2] J.H. de Boer, B.C. Lippens, B.G. Linsen, J.C.P. Broekhoff, A. van den Heuvel, T.J. Osinga, The t-curve of multimolecular N<sub>2</sub>-adsorption, *J. Colloid Interface Sci.* 21 (1966) 405–414. [https://doi.org/10.1016/0095-8522\(66\)90006-7](https://doi.org/10.1016/0095-8522(66)90006-7).
- [3] S.J. Gregg, K.S.W. Sing, *Adsorption, Surface Area and Porosity* 2nd ed, (1982).
- [4] F. Rodriguez-Reinoso, J.M. Martin-Martinez, C. Prado-Burguete, B. McEnaney, A standard adsorption isotherm for the characterization of activated carbons, *J. Phys. Chem.* 91 (1987) 515–516. <https://doi.org/10.1021/j100287a006>.
- [5] F. Costa, A.M. Fonseca, I.C. Neves, A.P. Carvalho, J. Pires, *Immobilization of hybriide tungsten complex in microporous structures*, 2006.
- [6] A.R. Silva, V. Guimarães, L. Carneiro, N. Nunes, S. Borges, J. Pires, ?. Martins, A.P. Carvalho, Copper(II) aza-bis(oxazoline) complex immobilized onto ITQ-2 and MCM-22 based materials as heterogeneous catalysts for the cyclopropanation of styrene, *Microporous Mesoporous Mater.* 179 (2013).  
<https://doi.org/10.1016/j.micromeso.2013.05.029>.
- [7] B. Cardoso, J. Pires, A.P. Carvalho, M.B. Carvalho, I. Kuźniarska-Biernacka, A.R. Silva, C. Freire, B. de Castro, Catalytic Properties of a Mn<sup>III</sup>-Salen Complex Immobilised in a Pillared Clay by Simultaneous Pillaring/Encapsulation Procedures, *Eur. J. Inorg. Chem.* 2005 (2005) 837–844.  
<https://doi.org/10.1002/ejic.200400521>.

- [8] C. Pereira, A.R. Silva, A.P. Carvalho, J. Pires, C. Freire, Vanadyl acetylacetonate anchored onto amine-functionalised clays and catalytic activity in the epoxidation of geraniol, *J. Mol. Catal. A Chem.* 283 (2008).  
<https://doi.org/10.1016/j.molcata.2007.11.034>.
- [9] L. Sarkisov, A. Harrison, Computational structure characterisation tools in application to ordered and disordered porous materials, *Mol. Simul.* 37 (2011) 1248–1257. <https://doi.org/10.1080/08927022.2011.592832>.
